# Supplementary material for: Atomistic Investigation of the Effects of Different Reinforcements on Al Matrix Composite
Source: MDPI journal article supplement (doi:10.3390/met12081252), 2022-07-26
Supplement: s1 [file s1]

Archive with 1 entries (1 files):
- metals-1755617-supplementary.pdf
