# Supplementary material for: Atomistic Investigation of the Effects of Different Reinforcements on Al Matrix Composite
Source: MDPI journal article supplement (doi:10.3390/met12081252), 2022-07-26
Supplement: s1 [file s1 › metals-1755617-supplementary.pdf]

## Supplementary materials

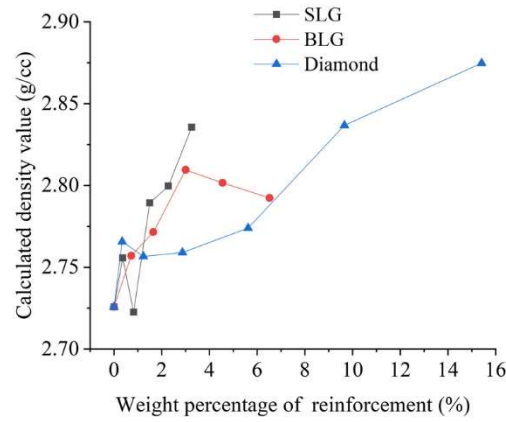

**Figure S1.** Calculated density as a function of the weight percentage of reinforcement.

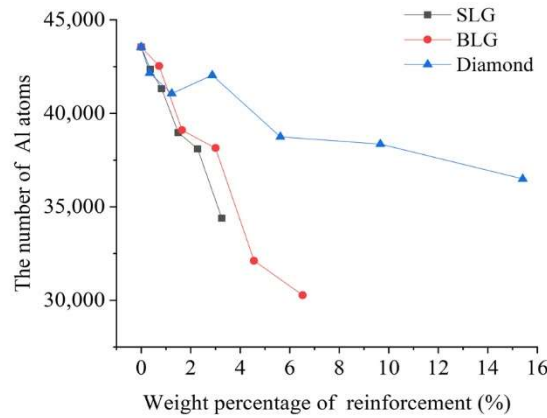

**Figure S2.** Total number of Al atoms arranged in the face-centered cubic (f.c.c.) and hexagonal close-packed (h.c.p.) lattices as a function of weight percentage of reinforcement.

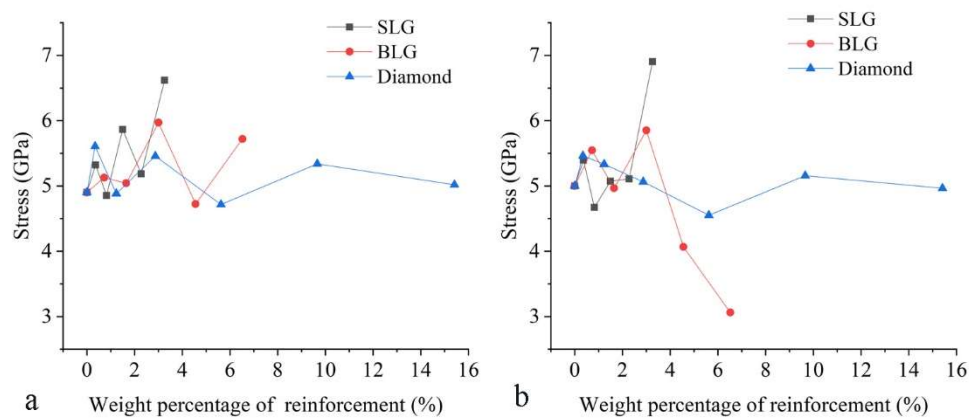

**Figure S3.** Tensile strength as a function of the weight percentage of reinforcement in the different systems, which were separately stretched in the (a) Y direction and (b) Z direction.
